# Supplementary material for: A strategically synthesized arseno-discriminatory tetra-phenoxido hetero-trinuclear complex envisioned for the recognition of iAs and oAs from Oryza sp. and aquatic crustaceans
Source: Royal Society of Chemistry journal article supplement (doi:10.1039/d3dt00201b), 2023-01-01
Supplement: d3dt00201b1.pdf [file d3dt00201b1.pdf]

## Electronic Supporting Information

### **Strategically synthesized Arseno-discriminatory terta-phenoxido hetero-trinuclear complex envisioned for recognition of *i*As and *o*As from *Oryza sp.* and aquatic crustacean**

Somrita Nag<sup>a,b</sup>, Koushik Pramanik<sup>c</sup>, Mohit Kumar Chattopadhyay<sup>a</sup>, Pijush Malpaharia<sup>c</sup>, Swapan K Chandra<sup>c\*</sup>, Priyabrata Banerjee<sup>a,b\*</sup>

<sup>a</sup> Surface Engineering & Tribology Group, CSIR-Central Mechanical Engineering Research Institute, Mahatma Gandhi Avenue, Durgapur-713209, West Bengal, India.

<sup>b</sup> Academy of Scientific and Innovative Research (AcSIR), AcSIR Headquarters CSIR-HRDC Campus, Postal Staff College Area, Sector 19, Kamla Nehru Nagar, Ghaziabad-201002, Uttar Pradesh, India.

<sup>c</sup> Department of Chemistry Visva-Bharati University Santiniketan 731235, India.

E-mail: [pr\\_banerjee@cmeri.res.in](mailto:pr_banerjee@cmeri.res.in) & [swapankumar.chandra@visva-bharati.ac.in](mailto:swapankumar.chandra@visva-bharati.ac.in)

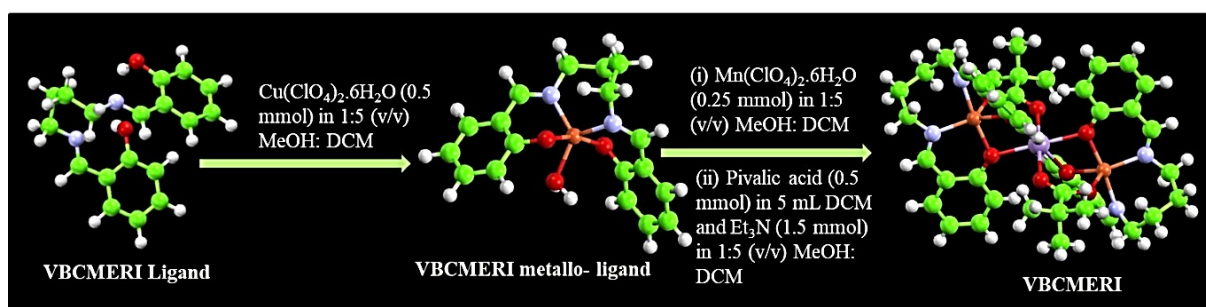

**Fig.S1.** Synthetic scheme of VBCMERICl

**Table S1:** Crystallographic data of VBCMERICl

| <b>Crystal Data</b>              |                                                                                  |
|----------------------------------|----------------------------------------------------------------------------------|
| Formula                          | C <sub>46</sub> H <sub>54</sub> Cu <sub>2</sub> Mn N <sub>4</sub> O <sub>8</sub> |
| Formula Weight                   | 972.97                                                                           |
| Crystal System                   | triclinic                                                                        |
| Space group                      | P-1(No. 2)                                                                       |
| a, b, c [Angstrom]               | 9.3404(10) 10.8427(11)<br>10.9733(12)                                            |
| alpha, beta, gamma [deg]         | 99.826(7) 105.966(7) 90.367(7)                                                   |
| V [Ang**3]                       | 1051.1(2)                                                                        |
| Z                                | 1                                                                                |
| D(calc) [g/cm**3]                | 1.537                                                                            |
| Mu(MoKa) [ /mm ]                 | 1.359                                                                            |
| F(000)                           | 505                                                                              |
| Crystal Size [mm]                | 0.18 x 0.28 x 0.36                                                               |
| <b>Data Collection</b>           |                                                                                  |
| Temperature (K)                  | 296                                                                              |
| Radiation [Angstrom]             | MoKa 0.71073                                                                     |
| Theta Min-Max [Deg]              | 3.0, 28.3                                                                        |
| Dataset                          | -12: 12 ; -14: 14 ; -14: 14                                                      |
| Tot., Uniq. Data, R(int)         | 33387, 5122, 0.148                                                               |
| Observed Data [I > 2.0 sigma(I)] | 2994                                                                             |

**Table S2:** Selected bond distances (angstrom) of VBCMERICl

|     |       |           |     |       |           |
|-----|-------|-----------|-----|-------|-----------|
| Cu1 | -O1   | 1.925(3)  | C10 | -C11  | 1.496(9)  |
| Cu1 | -O2   | 2.017(4)  | C12 | -C13  | 1.423(8)  |
| Cu1 | -O4   | 2.070(4)  | C13 | -C14  | 1.389(9)  |
| Cu1 | -N1   | 1.968(4)  | C13 | -C18  | 1.413(8)  |
| Cu1 | -N2   | 1.984(5)  | C14 | -C15  | 1.353(10) |
| Mn1 | -O1   | 2.228(4)  | C15 | -C16  | 1.390(11) |
| Mn1 | -O2   | 2.193(3)  | C16 | -C17  | 1.362(10) |
| Mn1 | -O3   | 2.209(4)  | C17 | -C18  | 1.389(8)  |
| Mn1 | -O1_a | 2.228(4)  | C19 | -C20  | 1.523(8)  |
| Mn1 | -O2_a | 2.193(3)  | C20 | -C22  | 1.40(2)   |
| Mn1 | -O3_a | 2.209(4)  | C20 | -C23  | 1.419(17) |
| O1  | -C1   | 1.309(7)  | C20 | -C24  | 1.39(2)   |
| O2  | -C18  | 1.314(6)  | C2  | -H2   | 0.9300    |
| O3  | -C19  | 1.244(7)  | C3  | -H3   | 0.9300    |
| O4  | -C19  | 1.238(8)  | C4  | -H4   | 0.9300    |
| N1  | -C11  | 1.449(8)  | C5  | -H5   | 0.9300    |
| N1  | -C12  | 1.277(7)  | C7  | -H7   | 0.9300    |
| N2  | -C7   | 1.269(8)  | C8  | -H8A  | 0.9700    |
| N2  | -C8   | 1.457(8)  | C8  | -H8B  | 0.9700    |
| C1  | -C2   | 1.383(8)  | C9  | -H9A  | 0.9700    |
| C1  | -C6   | 1.416(8)  | C9  | -H9B  | 0.9700    |
| C2  | -C3   | 1.379(9)  | C10 | -H10A | 0.9700    |
| C3  | -C4   | 1.372(10) | C10 | -H10B | 0.9700    |
| C4  | -C5   | 1.360(9)  | C11 | -H11A | 0.9700    |
| C5  | -C6   | 1.391(9)  | C11 | -H11B | 0.9700    |
| C6  | -C7   | 1.422(9)  | C12 | -H12  | 0.9300    |

**Table S3:** Selected bond angles (degrees) of VBCMERI

|     |      |      |           |      |      |       |        |
|-----|------|------|-----------|------|------|-------|--------|
| C12 | -C13 | -C18 | 122.0(5)  | N2   | -C8  | -H8A  | 109.00 |
| C14 | -C13 | -C18 | 119.4(5)  | N2   | -C8  | -H8B  | 109.00 |
| C13 | -C14 | -C15 | 121.6(6)  | C9   | -C8  | -H8A  | 109.00 |
| C14 | -C15 | -C16 | 118.8(7)  | C9   | -C8  | -H8B  | 109.00 |
| C15 | -C16 | -C17 | 121.2(7)  | H8A  | -C8  | -H8B  | 108.00 |
| C16 | -C17 | -C18 | 120.7(6)  | C8   | -C9  | -H9A  | 108.00 |
| O2  | -C18 | -C13 | 121.8(5)  | C8   | -C9  | -H9B  | 108.00 |
| O2  | -C18 | -C17 | 120.2(5)  | C10  | -C9  | -H9A  | 108.00 |
| C13 | -C18 | -C17 | 118.1(5)  | C10  | -C9  | -H9B  | 108.00 |
| O3  | -C19 | -O4  | 125.4(5)  | H9A  | -C9  | -H9B  | 107.00 |
| O3  | -C19 | -C20 | 120.3(6)  | C9   | -C10 | -H10A | 108.00 |
| O4  | -C19 | -C20 | 114.3(5)  | C9   | -C10 | -H10B | 108.00 |
| C19 | -C20 | -C22 | 114.1(8)  | C11  | -C10 | -H10A | 108.00 |
| C19 | -C20 | -C23 | 110.3(8)  | C11  | -C10 | -H10B | 108.00 |
| C19 | -C20 | -C24 | 109.3(9)  | H10A | -C10 | -H10B | 107.00 |
| C22 | -C20 | -C23 | 114.7(16) | N1   | -C11 | -H11A | 109.00 |
| C22 | -C20 | -C24 | 105.2(15) | N1   | -C11 | -H11B | 109.00 |
| C23 | -C20 | -C24 | 102.4(19) | C10  | -C11 | -H11A | 109.00 |
| C1  | -C2  | -H2  | 119.00    | C10  | -C11 | -H11B | 109.00 |
| C3  | -C2  | -H2  | 119.00    | H11A | -C11 | -H11B | 108.00 |
| C2  | -C3  | -H3  | 120.00    | N1   | -C12 | -H12  | 117.00 |
| C4  | -C3  | -H3  | 120.00    | C13  | -C12 | -H12  | 117.00 |
| C3  | -C4  | -H4  | 120.00    | C13  | -C14 | -H14  | 119.00 |
| C5  | -C4  | -H4  | 120.00    | C15  | -C14 | -H14  | 119.00 |
| C4  | -C5  | -H5  | 119.00    | C14  | -C15 | -H15  | 121.00 |
| C6  | -C5  | -H5  | 119.00    | C16  | -C15 | -H15  | 121.00 |

**Table S4:** Hydrogen bonding in VBCMERI

|     |        |      |        |        |           |        |
|-----|--------|------|--------|--------|-----------|--------|
| C8  | --H8A  | ..N1 | 0.9700 | 2.5200 | 2.900(8)  | 103.00 |
| C10 | --H10B | ..O4 | 0.9700 | 2.4200 | 3.145(8)  | 132.00 |
| C17 | --H17  | ..O3 | 0.9300 | 2.5400 | 3.255(8)  | 133.00 |
| C22 | --H22C | ..O3 | 0.9600 | 2.2800 | 2.738(16) | 108.00 |
| C23 | --H23B | ..O4 | 0.9600 | 2.3100 | 2.656(19) | 100.00 |

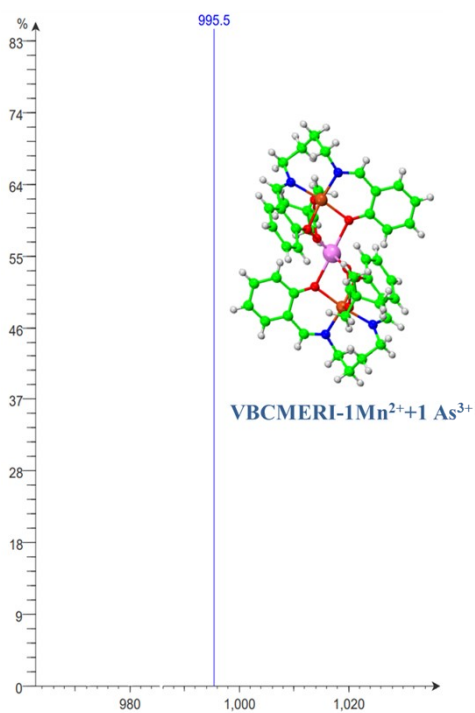

**Fig.S2.** ESI-MS spectra of VBCMERI with  $\text{As}^{3+}$

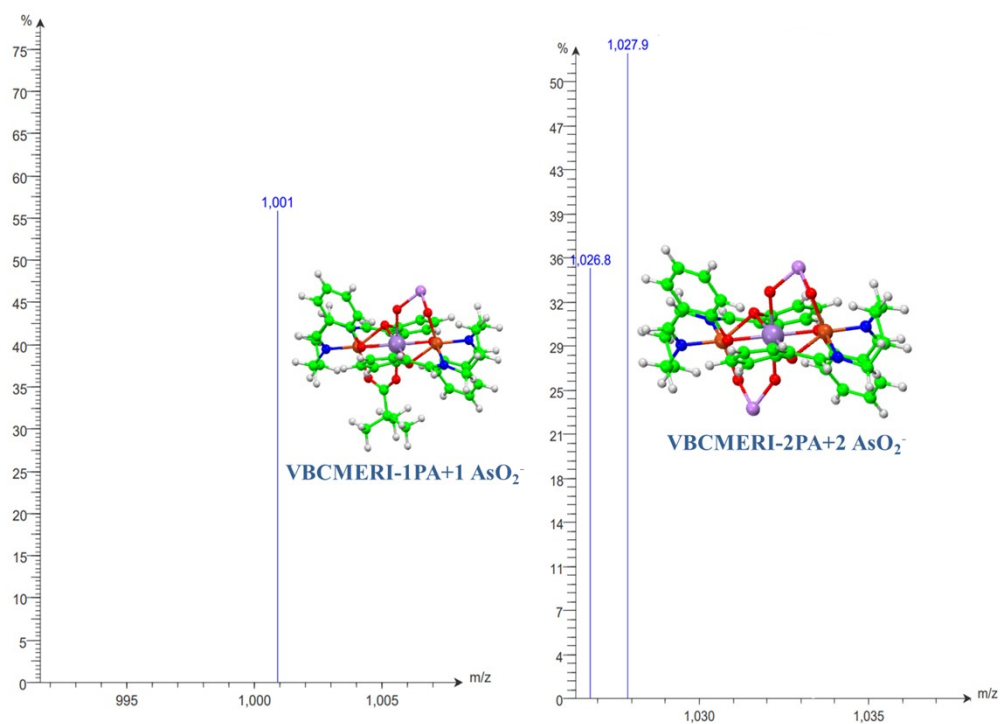

**Fig.S3.** ESI-MS spectra of VBCMERI with  $\text{AsO}_2^-$

**Table S5: CARTESIAN COORDINATES of VBCMERI\_T (ANGSTROM)**

|    |          |          |          |
|----|----------|----------|----------|
| Mn | 2.926609 | 5.004230 | 4.940842 |
| Cu | 1.138995 | 6.670271 | 6.610474 |
| O  | 2.766658 | 7.101748 | 5.429377 |
| O  | 3.439106 | 4.599709 | 6.998305 |

|   |           |           |           |
|---|-----------|-----------|-----------|
| O | 0.795292  | 5.035682  | 5.380290  |
| O | 1.993799  | 5.917732  | 8.215822  |
| N | 1.008729  | 8.679610  | 6.841376  |
| N | -0.865796 | 6.580274  | 6.915331  |
| C | 0.811314  | 9.230750  | 8.183729  |
| C | 1.077188  | 9.460868  | 5.807321  |
| C | -1.705945 | 7.777223  | 6.939375  |
| C | -0.848994 | 3.180521  | 8.193946  |
| C | 2.381561  | 7.904027  | 4.319934  |
| C | 0.379060  | 3.978254  | 6.244024  |
| C | -0.249336 | 8.454182  | 8.966548  |
| C | -0.509069 | 4.225061  | 7.317786  |
| C | 1.468532  | 8.970198  | 4.476453  |
| C | 3.549124  | 4.496743  | 9.455201  |
| C | -1.641113 | 8.476616  | 8.308106  |
| C | 0.630697  | 2.641139  | 5.904195  |
| C | -1.313441 | 5.456465  | 7.378035  |
| C | 0.291435  | 1.603380  | 6.775192  |
| C | 2.958316  | 5.023688  | 8.157867  |
| C | 1.132403  | 9.765218  | 3.366672  |
| C | -0.404737 | 1.881700  | 7.948945  |
| C | 3.118477  | 7.834151  | 3.126293  |
| C | 1.758853  | 9.565774  | 2.136587  |
| C | 2.779168  | 8.624340  | 2.026426  |
| C | 2.419393  | 4.235882  | 10.472214 |
| C | 4.308536  | 3.175571  | 9.211619  |
| C | 4.520013  | 5.546926  | 10.021141 |
| O | 5.038326  | 5.164861  | 4.511426  |
| O | 3.135637  | 2.902501  | 4.505551  |
| O | 2.390611  | 5.270780  | 2.860566  |
| H | 1.776848  | 9.170846  | 8.736044  |
| H | 0.511079  | 10.305888 | 8.147863  |
| H | 0.896205  | 10.531354 | 5.919322  |
| H | -1.394881 | 8.470129  | 6.129455  |
| H | -2.766675 | 7.513691  | 6.711540  |
| H | -1.509038 | 3.361831  | 9.037909  |
| H | -0.339223 | 8.919826  | 9.975494  |
| H | 0.086717  | 7.407464  | 9.137160  |
| H | -2.352196 | 7.963848  | 8.997052  |
| H | -1.988939 | 9.530176  | 8.198975  |

|   |           |           |           |
|---|-----------|-----------|-----------|
| H | 0.991154  | 2.383193  | 4.923593  |
| H | -2.327181 | 5.394830  | 7.778380  |
| H | 0.527638  | 0.576091  | 6.515636  |
| H | 0.422253  | 10.581497 | 3.468753  |
| H | -0.682817 | 1.075495  | 8.620511  |
| H | 3.959203  | 7.158986  | 3.039998  |
| H | 1.500773  | 10.189829 | 1.286675  |
| H | 3.323276  | 8.519643  | 1.092914  |
| H | 2.832165  | 3.822905  | 11.421830 |
| H | 1.875868  | 5.178155  | 10.716528 |
| H | 1.685581  | 3.504176  | 10.060433 |
| H | 5.163372  | 3.331572  | 8.513185  |
| H | 4.716208  | 2.773231  | 10.168024 |
| H | 3.627993  | 2.409783  | 8.771096  |
| H | 5.343635  | 5.748670  | 9.297171  |
| H | 3.988542  | 6.506268  | 10.222131 |
| H | 4.971475  | 5.190600  | 10.976170 |
| H | 5.304696  | 6.123955  | 4.789321  |
| H | 5.132880  | 5.145085  | 3.483041  |
| H | 3.659827  | 2.513686  | 5.307216  |
| H | 3.798398  | 2.844795  | 3.714957  |
| H | 3.055445  | 4.696171  | 2.317328  |
| H | 1.484689  | 4.785024  | 2.754507  |

**Table S6: CARTESIAN COORDINATES of VBCMERI\_T+ Arsenobetaine (ANGSTROM)**

|    |           |          |          |
|----|-----------|----------|----------|
| Mn | 2.768395  | 5.131957 | 4.332668 |
| Cu | 1.285501  | 6.789079 | 6.294413 |
| O  | 2.596046  | 7.233484 | 4.771888 |
| O  | 3.849424  | 4.956088 | 6.207576 |
| O  | 0.886534  | 5.038590 | 5.331979 |
| O  | 2.530965  | 6.164235 | 7.699032 |
| N  | 1.159292  | 8.793317 | 6.538288 |
| N  | -0.732705 | 6.650776 | 6.751236 |
| C  | 1.096923  | 9.308957 | 7.904742 |
| C  | 1.054227  | 9.587282 | 5.513894 |
| C  | -1.538281 | 7.868976 | 6.846809 |
| C  | -0.825194 | 3.281527 | 8.112558 |
| C  | 1.954342  | 8.000997 | 3.767874 |
| C  | 0.691498  | 4.111183 | 6.396206 |
| C  | 0.101619  | 8.511110 | 8.750105 |
| C  | -0.441965 | 4.286256 | 7.209655 |

|    |           |           |           |
|----|-----------|-----------|-----------|
| C  | 1.145937  | 9.102537  | 4.122938  |
| As | 3.927902  | 4.011252  | 9.909452  |
| C  | -1.342016 | 8.556195  | 8.210768  |
| C  | 1.493454  | 2.974358  | 6.592853  |
| C  | -1.246122 | 5.516004  | 7.136397  |
| C  | 1.109507  | 1.981221  | 7.499380  |
| C  | 3.604923  | 5.442507  | 7.422428  |
| C  | 0.582628  | 9.902014  | 3.112970  |
| C  | -0.056129 | 2.127069  | 8.247412  |
| C  | 2.363880  | 7.875975  | 2.430566  |
| C  | 0.880433  | 9.663193  | 1.771009  |
| C  | 1.797201  | 8.670476  | 1.432013  |
| C  | 2.063052  | 4.438620  | 10.366178 |
| C  | 4.118206  | 2.144490  | 9.325014  |
| C  | 5.028679  | 4.254822  | 11.521029 |
| O  | 4.644144  | 5.392843  | 3.304358  |
| O  | 2.917126  | 3.019826  | 3.900337  |
| O  | 1.663575  | 5.254655  | 2.481179  |
| C  | 4.612710  | 5.215591  | 8.508978  |
| H  | 2.107905  | 9.219659  | 8.363747  |
| H  | 0.809446  | 10.387779 | 7.928345  |
| H  | 0.877998  | 10.653053 | 5.668566  |
| H  | -1.285252 | 8.555899  | 6.014399  |
| H  | -2.622657 | 7.642060  | 6.706364  |
| H  | -1.712812 | 3.400396  | 8.727730  |
| H  | 0.099629  | 8.944855  | 9.777072  |
| H  | 0.448032  | 7.457802  | 8.856392  |
| H  | -1.997679 | 8.045647  | 8.954216  |
| H  | -1.684444 | 9.614776  | 8.141109  |
| H  | 2.427710  | 2.844210  | 6.088089  |
| H  | -2.274801 | 5.477021  | 7.499777  |
| H  | 1.719817  | 1.092487  | 7.623824  |
| H  | -0.054007 | 10.744873 | 3.368381  |
| H  | -0.350747 | 1.355420  | 8.951693  |
| H  | 3.139120  | 7.170314  | 2.157817  |
| H  | 0.448666  | 10.291146 | 0.997898  |
| H  | 2.090698  | 8.533503  | 0.395894  |
| H  | 1.695583  | 3.723591  | 11.134779 |
| H  | 2.009082  | 5.475892  | 10.764502 |
| H  | 1.432497  | 4.363394  | 9.457461  |



|   |          |          |           |
|---|----------|----------|-----------|
| H | 5.176787 | 1.827147 | 9.451386  |
| H | 3.457774 | 1.491731 | 9.937642  |
| H | 3.846239 | 2.064283 | 8.251704  |
| H | 6.089403 | 4.017866 | 11.283919 |
| H | 4.951528 | 5.309996 | 11.865019 |
| H | 4.665741 | 3.574957 | 12.323281 |
| H | 5.117083 | 6.157911 | 3.813718  |
| H | 3.921738 | 2.797967 | 4.001285  |
| H | 2.223121 | 4.715284 | 1.799575  |
| H | 4.864306 | 6.193932 | 8.976687  |
| H | 5.546956 | 4.780188 | 8.087390  |

**Table S7: CARTESIAN COORDINATES of VBCMERI\_T+Arsenobetaine+As<sup>3+</sup> (ANGSTROM)**

|    |           |          |          |
|----|-----------|----------|----------|
| As | 2.974710  | 5.367775 | 4.693049 |
| Cu | 1.368060  | 6.991251 | 6.415360 |
| O  | 2.664433  | 7.258596 | 4.890129 |
| O  | 3.875772  | 5.258044 | 6.379668 |
| O  | 1.125029  | 5.354555 | 5.251009 |
| O  | 2.533379  | 6.426711 | 7.863146 |
| N  | 1.225749  | 8.998496 | 6.479481 |
| N  | -0.558275 | 6.759185 | 6.939722 |
| C  | 1.141116  | 9.657780 | 7.781159 |
| C  | 1.126449  | 9.666602 | 5.373423 |
| C  | -1.422145 | 7.931784 | 7.076042 |
| C  | -0.432224 | 3.265589 | 7.957060 |
| C  | 1.872293  | 7.813935 | 3.821035 |
| C  | 0.814285  | 4.237344 | 6.093311 |
| C  | 0.324161  | 8.822554 | 8.774376 |
| C  | -0.109900 | 4.380137 | 7.162377 |
| C  | 1.116149  | 8.986750 | 4.067788 |
| As | 3.773229  | 4.040125 | 9.908665 |
| C  | -1.162010 | 8.675079 | 8.396981 |
| C  | 1.178701  | 2.925204 | 5.716836 |
| C  | -0.941751 | 5.588933 | 7.342542 |
| C  | 0.842062  | 1.826687 | 6.508289 |
| C  | 3.601796  | 5.715360 | 7.597174 |
| C  | 0.398388  | 9.599491 | 3.027008 |
| C  | 0.070592  | 2.003350 | 7.651427 |
| C  | 1.965070  | 7.364643 | 2.480109 |
| C  | 0.437990  | 9.081291 | 1.736005 |
| C  | 1.232058  | 7.974322 | 1.460451 |

|   |           |           |           |
|---|-----------|-----------|-----------|
| C | 2.006093  | 4.618402  | 10.552973 |
| C | 3.621415  | 2.333896  | 8.946680  |
| C | 4.964783  | 3.791942  | 11.453342 |
| O | 4.441061  | 6.119562  | 3.728898  |
| O | 3.806395  | 3.646954  | 4.667848  |
| O | 2.526310  | 4.368455  | 3.127203  |
| C | 4.546523  | 5.402658  | 8.714620  |
| H | 2.172475  | 9.787059  | 8.181613  |
| H | 0.677020  | 10.669963 | 7.696358  |
| H | 0.961279  | 10.744972 | 5.399663  |
| H | -1.261797 | 8.612084  | 6.212571  |
| H | -2.498073 | 7.637721  | 7.028753  |
| H | -1.119033 | 3.365633  | 8.793373  |
| H | 0.374362  | 9.328919  | 9.766304  |
| H | 0.783113  | 7.821149  | 8.915292  |
| H | -1.669742 | 8.116142  | 9.217355  |
| H | -1.634462 | 9.683638  | 8.345332  |
| H | 1.710286  | 2.732631  | 4.795512  |
| H | -1.925997 | 5.471716  | 7.799783  |
| H | 1.170473  | 0.831661  | 6.224545  |
| H | -0.188723 | 10.494739 | 3.214678  |
| H | -0.193441 | 1.148706  | 8.266336  |
| H | 2.625226  | 6.568398  | 2.182034  |
| H | -0.120277 | 9.562486  | 0.938837  |
| H | 1.302914  | 7.600883  | 0.443337  |
| H | 1.581916  | 3.836725  | 11.220958 |
| H | 2.112745  | 5.572152  | 11.115417 |
| H | 1.325703  | 4.775261  | 9.689393  |
| H | 4.638931  | 1.938139  | 8.733983  |
| H | 3.058144  | 1.603728  | 9.568928  |
| H | 3.087436  | 2.503368  | 7.988934  |
| H | 5.966449  | 3.462582  | 11.098790 |
| H | 5.062576  | 4.754227  | 12.002908 |
| H | 4.537107  | 3.019376  | 12.130001 |
| H | 5.222544  | 6.173441  | 4.403250  |
| H | 4.577556  | 3.430860  | 4.011048  |
| H | 3.417842  | 4.091975  | 2.683010  |
| H | 4.746639  | 6.326968  | 9.301905  |
| H | 5.512115  | 5.022885  | 8.309975  |

**Table S8: CARTESIAN COORDINATES of VBCMERI\_T+As<sup>3+</sup> (ANGSTROM)**

|      |                   |                   |                   |
|------|-------------------|-------------------|-------------------|
| 1 as | 5.12004724396150  | 9.12555464141398  | 9.51163185957555  |
| 2 cu | 1.32580541706225  | 12.70723271080776 | 13.05185540050081 |
| 3 o  | 4.28428921926404  | 12.70559829379307 | 10.05727634034544 |
| 4 o  | 6.59986934587562  | 9.02948339203579  | 12.84400126449412 |
| 5 o  | 1.74100535465391  | 8.72181624536708  | 10.95751411786224 |
| 6 o  | 3.76064568712713  | 10.82986808306138 | 15.53986595969475 |
| 7 n  | 1.65221578613886  | 16.42011362573701 | 13.28152866120646 |
| 8 n  | -2.30008075507583 | 11.89060823762010 | 12.66570474987530 |
| 9 c  | 0.37325564340308  | 17.65597402870070 | 15.41956185122451 |
| 10 c | 2.34407883293816  | 17.84886914288456 | 11.40237349113677 |
| 11 c | -3.95226363162010 | 14.11490860706054 | 12.72137096235060 |
| 12 c | -3.41249099864280 | 5.19253565939268  | 13.98296031418817 |
| 13 c | 4.53799283107615  | 14.63514564413891 | 8.37839607064498  |
| 14 c | 0.55803465004146  | 6.80771749658799  | 12.17521506808109 |
| 15 c | -1.56823105476971 | 15.94401122757967 | 16.73466928599608 |
| 16 c | -2.01842922585164 | 7.24059983545476  | 12.94877220861964 |
| 17 c | 3.65654229102867  | 17.12141433469827 | 9.08262386135174  |
| 18 c | 7.68617113276515  | 9.09702589948429  | 17.22122316818745 |
| 19 c | -4.07011300968874 | 15.40224126065692 | 15.34435773458138 |
| 20 c | 1.65191673611522  | 4.41837624729717  | 12.66796862421245 |
| 21 c | -3.33617976780095 | 9.66754152785939  | 12.83584992249682 |
| 22 c | 0.23366185639194  | 2.46506668302882  | 13.76715254080896 |
| 23 c | 5.78629207470083  | 9.74339276984122  | 15.09504345610146 |
| 24 c | 4.01572371424892  | 19.14421532511426 | 7.34139584440775  |
| 25 c | -2.32475953113519 | 2.82134086372314  | 14.40427490570036 |
| 26 c | 5.65301580307562  | 14.33668762496432 | 5.96055066387595  |
| 27 c | 5.15305631201839  | 18.81972053156845 | 4.98450364640971  |
| 28 c | 5.95989131568524  | 16.37942281970816 | 4.30361537222546  |
| 29 c | 6.60737937198063  | 9.95607970188053  | 19.78443914155784 |
| 30 c | 8.14187375617605  | 6.20726920597968  | 17.23621542173392 |
| 31 c | 10.19838498317096 | 10.49590090220434 | 16.67157936176364 |
| 32 o | 8.17391531864236  | 10.06015410998659 | 8.26905697387677  |
| 33 o | 5.96214944548322  | 5.77049945820067  | 9.39062788812939  |
| 34 o | 3.59868892581064  | 9.05370267493549  | 6.42486516112501  |
| 35 h | 1.85852398718013  | 18.13873899453950 | 16.83344108789386 |
| 36 h | -0.51376927294763 | 19.47491029879355 | 14.81325577321912 |
| 37 h | 1.86975426797543  | 19.89914604646831 | 11.49155346482743 |
| 38 h | -3.23262865447873 | 15.47617981347309 | 11.28987573685538 |
| 39 h | -5.91684483629258 | 13.59321966605241 | 12.15846191816280 |
| 40 h | -5.40388773136551 | 5.52873330831645  | 14.50571943164921 |

|      |                   |                   |                   |
|------|-------------------|-------------------|-------------------|
| 41 h | -2.05837149169199 | 16.85852990988201 | 18.56572631209127 |
| 42 h | -0.61251120044093 | 14.13303260319580 | 17.23214436758928 |
| 43 h | -5.24309894042986 | 14.19357360912282 | 16.60781064069591 |
| 44 h | -5.13525581790991 | 17.20176931004871 | 15.09327224805252 |
| 45 h | 3.62326951939238  | 4.10326252725262  | 12.10115580750347 |
| 46 h | -5.43241740849382 | 9.54320199560646  | 13.02751907107873 |
| 47 h | 1.14764370962004  | 0.62155835654157  | 14.10369512753323 |
| 48 h | 3.34431319367816  | 21.03595300314422 | 7.90678058113278  |
| 49 h | -3.44713511259233 | 1.27446472344238  | 15.23020801784886 |
| 50 h | 6.30113612894384  | 12.45896569491130 | 5.38546598574353  |
| 51 h | 5.39878065709148  | 20.43377235817343 | 3.69261192173609  |
| 52 h | 6.85405565456086  | 16.04647556612661 | 2.45000886238922  |
| 53 h | 7.97704010823510  | 9.50193748361487  | 21.31327623802446 |
| 54 h | 6.25066236245313  | 12.02495843553132 | 19.80948777452390 |
| 55 h | 4.79487781976008  | 8.98687445720616  | 20.21648400316223 |
| 56 h | 8.91867053743033  | 5.55329724585264  | 15.40021194635915 |
| 57 h | 9.51011767658749  | 5.71295937474323  | 18.75488705396281 |
| 58 h | 6.35646343302862  | 5.15898381290527  | 17.60425621566161 |
| 59 h | 11.02683525635886 | 9.88076725328831  | 14.84387369265086 |
| 60 h | 9.91049304523678  | 12.57799109376080 | 16.59774830577816 |
| 61 h | 11.58493043760453 | 10.08634786928046 | 18.19903766271413 |
| 62 h | 9.30893611932774  | 8.65301305053740  | 8.72894440737565  |
| 63 h | 5.29595079166857  | 5.18937856495646  | 7.74619004295934  |
| 64 h | 1.76303934510646  | 9.05134713991179  | 6.75910687742822  |

**Table S9: CARTESIAN COORDINATES of VBCMERI\_T+AsO<sub>2</sub><sup>-</sup>+As<sup>3+</sup> (ANGSTROM)**

|      |                   |                   |                   |
|------|-------------------|-------------------|-------------------|
| 1 as | 5.76936054486570  | 9.54732637116840  | 9.45028765572732  |
| 2 cu | 2.12262355964640  | 13.00618607480061 | 13.51117570035120 |
| 3 o  | 4.56012035157258  | 13.09029995540591 | 9.79642066182269  |
| 4 o  | 7.96458473809764  | 10.22154282665121 | 12.15384991149516 |
| 5 o  | 3.00535365735366  | 9.11341854354150  | 11.97061464895564 |
| 6 o  | 4.82459206387168  | 12.18956730838434 | 15.99156182631269 |
| 7 n  | 1.95880265908639  | 16.77331804196767 | 13.13333197628308 |
| 8 n  | -1.51292462947590 | 12.01915233568043 | 13.06309429138391 |
| 9 c  | 0.88783352018964  | 18.06952010052535 | 15.34507335004113 |
| 10 c | 2.23589521491948  | 18.06910139443109 | 11.06678854651452 |
| 11 c | -3.28057080932839 | 14.15316239492610 | 13.04654663251118 |
| 12 c | -2.53383406646232 | 5.17338138364300  | 13.51938247309310 |
| 13 c | 4.15306136597842  | 14.78966202879116 | 7.93695154200772  |
| 14 c | 1.60729261396588  | 7.05294421506816  | 12.53980153123123 |

|       |                   |                   |                   |
|-------|-------------------|-------------------|-------------------|
| 15 c  | -0.91551871417420 | 16.37049297081784 | 16.86197051078280 |
| 16 c  | -1.06434328197424 | 7.35387554848951  | 12.96536022347780 |
| 17 c  | 3.14140194863933  | 17.23943644360559 | 8.59375725520432  |
| 18 c  | -3.41558362465180 | 15.58909902917261 | 15.58820528072874 |
| 19 c  | 2.67725391849465  | 4.61477918825563  | 12.81933065457243 |
| 20 c  | -2.44202138152759 | 9.74933347118623  | 12.93931778607020 |
| 21 c  | 1.17271744901506  | 2.51541249775044  | 13.40761591936378 |
| 22 as | 7.80906924328552  | 11.27318191401789 | 15.35848330708769 |
| 23 c  | 2.87162586881618  | 19.08549112581857 | 6.65184454589250  |
| 24 c  | -1.45583280018062 | 2.77307481232207  | 13.74284605448240 |
| 25 c  | 4.70418460296690  | 14.31851599070668 | 5.35301399272080  |
| 26 c  | 3.47661124177684  | 18.60137830210387 | 4.13204905081036  |
| 27 c  | 4.37573883390140  | 16.17833668729472 | 3.49926023274806  |
| 28 o  | 8.19327408265853  | 10.51938867922623 | 7.21830178054568  |
| 29 o  | 6.91238932091940  | 6.28149836306016  | 9.55839539095975  |
| 30 o  | 3.51075244675808  | 8.87359358475717  | 6.92631360639804  |
| 31 h  | 2.48883507602685  | 18.59703907402503 | 16.60875740507455 |
| 32 h  | -0.06769933343360 | 19.86144069267261 | 14.76764148120663 |
| 33 h  | 1.63314110161219  | 20.08725219296182 | 11.09700180669532 |
| 34 h  | -2.66190300706649 | 15.46305877680126 | 11.52430142542041 |
| 35 h  | -5.22167596141547 | 13.49589916042830 | 12.55157413688543 |
| 36 h  | -4.58452577413404 | 5.41857209394473  | 13.80751567483009 |
| 37 h  | -1.39566938806196 | 17.39999459895602 | 18.63312793486272 |
| 38 h  | 0.14855229051995  | 14.65531132863021 | 17.46933804208109 |
| 39 h  | -4.48104534589955 | 14.39826966600341 | 16.95835917255651 |
| 40 h  | -4.59595436997945 | 17.29994657965823 | 15.25015478030435 |
| 41 h  | 4.72000469915168  | 4.40516407770431  | 12.52014668112511 |
| 42 h  | -4.53724208461082 | 9.53917155806313  | 12.87051303061643 |
| 43 h  | 2.07359218361654  | 0.64608668848837  | 13.60733560950992 |
| 44 h  | 2.12678485540541  | 20.95731525375988 | 7.19069027784677  |
| 45 h  | -2.64103020118172 | 1.12052482218992  | 14.18747432614366 |
| 46 h  | 5.42362487824098  | 12.45630467986697 | 4.81070030971905  |
| 47 h  | 3.23863495645836  | 20.07355023164657 | 2.67968509679414  |
| 48 h  | 4.84739010541615  | 15.71982363760357 | 1.52080916764689  |
| 49 h  | 9.73283602454773  | 9.62502556028976  | 7.77282692419035  |
| 50 h  | 6.04699534410412  | 5.40945290503150  | 8.15408626486762  |
| 51 h  | 1.79911527250552  | 9.17027131430785  | 7.59758303360922  |

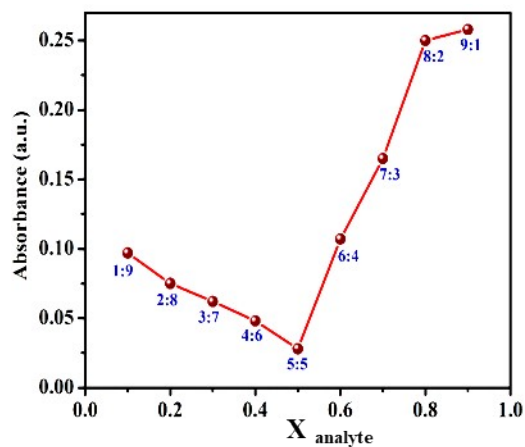

Fig.S4. Job's plot of VBCMERIC with  $\text{As}^{3+}$

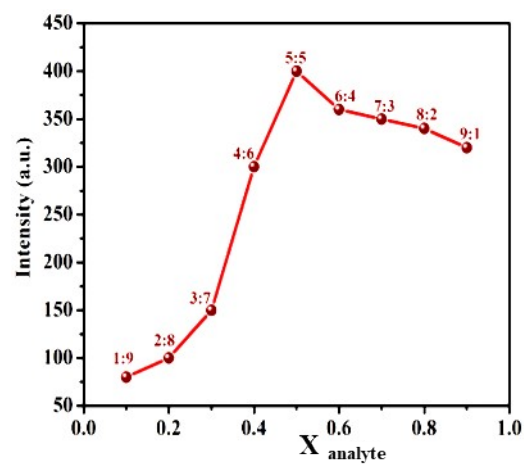

Fig.S5. Job's plot of VBCMERIC with  $\text{AsO}_2^-$

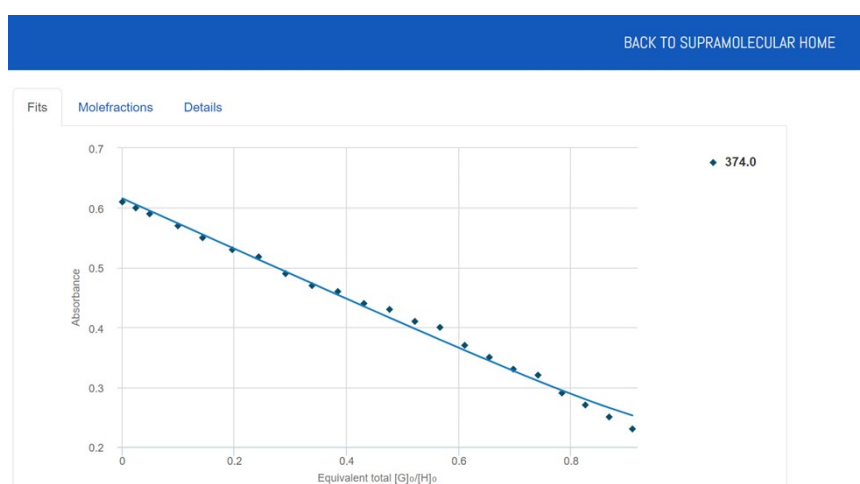

Fig.S6. Binding constant evaluation of VBCMERIC with  $\text{As}^{3+}$   
[\[http://supramolecular.org\]](http://supramolecular.org)  
 Binding constant =  $9.5 \times 10^5 \text{ M}^{-1}$

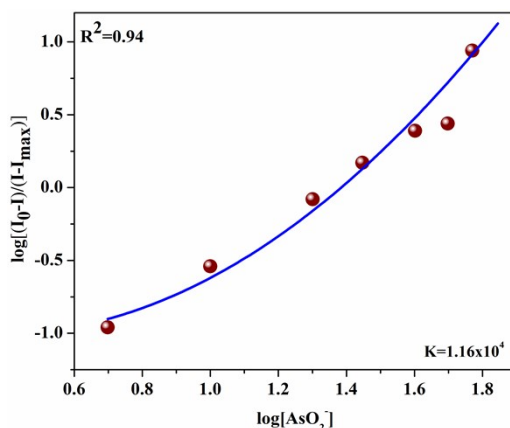

**Fig.S7.** Association constant plot for  $\text{AsO}_2^-$  with VBCMERI from emission titration

### Detection limit calculation

The detection limit (DL) has been calculated following UV-Vis titration for  $\text{As}^{3+}$  and PL titration for  $\text{AsO}_2^-$ . For LOD calculation, the concentration of  $\text{As}^{3+}$  and  $\text{AsO}_2^-$  were taken as  $10^{-5}$  M. The absorbance spectrum and emission spectrum of VBCMERI were repeated 5 times, and the standard deviation was measured. The limit of detection (LOD) is calculated from the following formula:  $\text{DL} = 3\sigma/k$ ;  $\sigma$  is the standard deviation of the blank solution of VBCMERI. Gradual emergence of new absorbance values during colorimetric quenching with  $\text{As}^{3+}$  and enhanced fluorogenic response with  $\text{AsO}_2^-$  are plotted against its concentration. The slope (k) is derived from these plots.

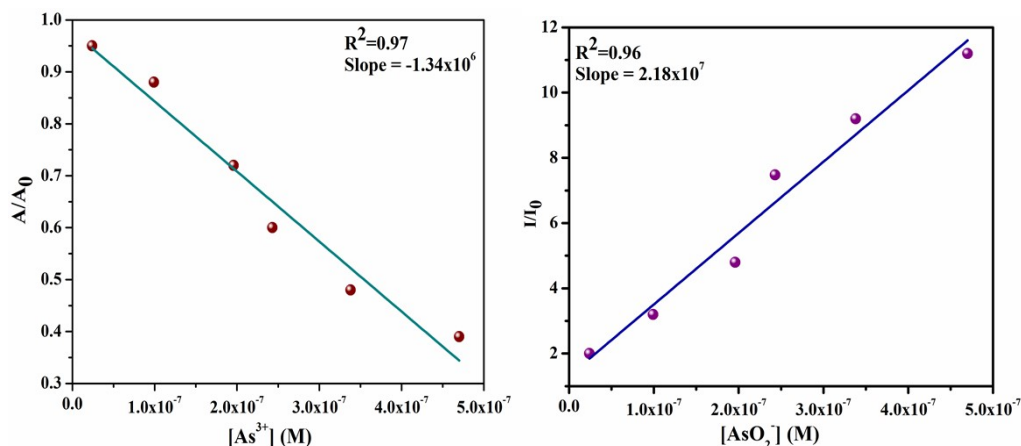

**Fig.S8.** The ratio of absorbance of VBCMERI with  $\text{As}^{3+}$  and (b) the Ratio of emission of VBCMERI with  $\text{AsO}_2^-$

### Rate constant calculation

Rate constant of the host-guest interaction was calculated from UV-Vis spectroscopy. The sensor and the analytes were taken in similar concentration and the plots of absorbance vs. time were observed in a fixed wavelength. After those three graphs were plotted (i) Absorbance vs. time, (ii)  $\ln$  Absorbance

vs. time and (iii) 1/Absorbance vs. time. Among the three plots, the plot in which the R-value is more closed to 1 is chosen and accordingly the order of the reaction was known. Furthermore, the reaction rate was obtained from the slope of the specific plot.

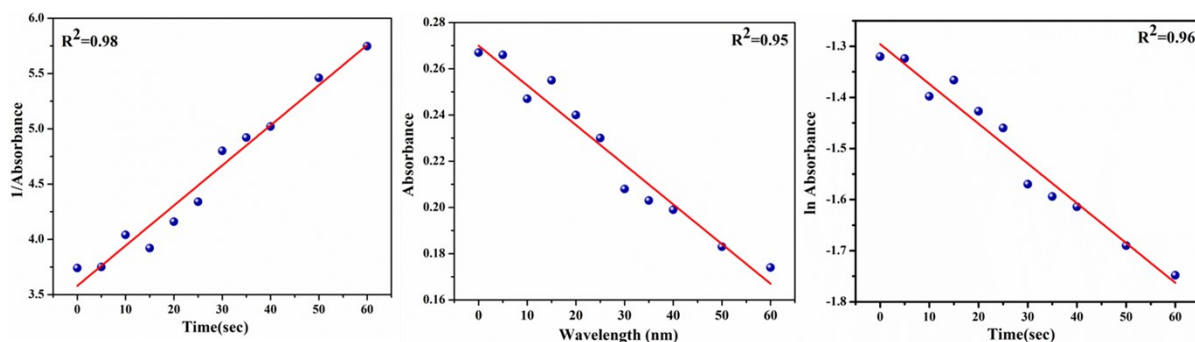

**Fig.S9.** Plots of Absorbance vs. Time of VBCMEREI with  $As^{3+}$

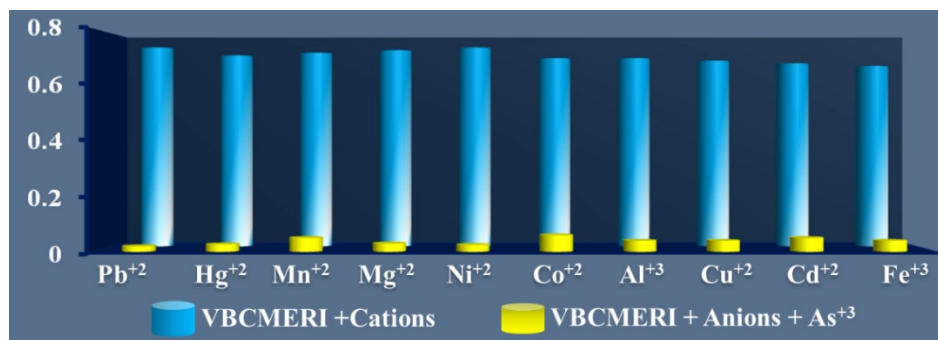

**Fig.S10.a.** Interference of VBCMEREI with different cationic analytes in MeOH- $H_2O$

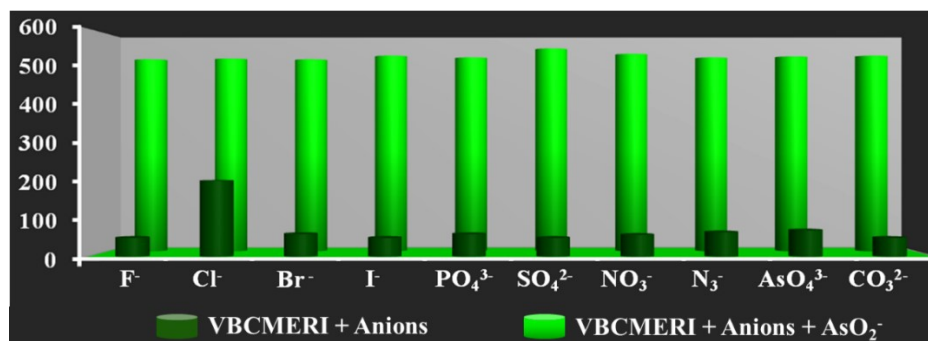

**Fig.S10.b.** Interference of VBCMEREI with different anionic analytes in MeOH- $H_2O$



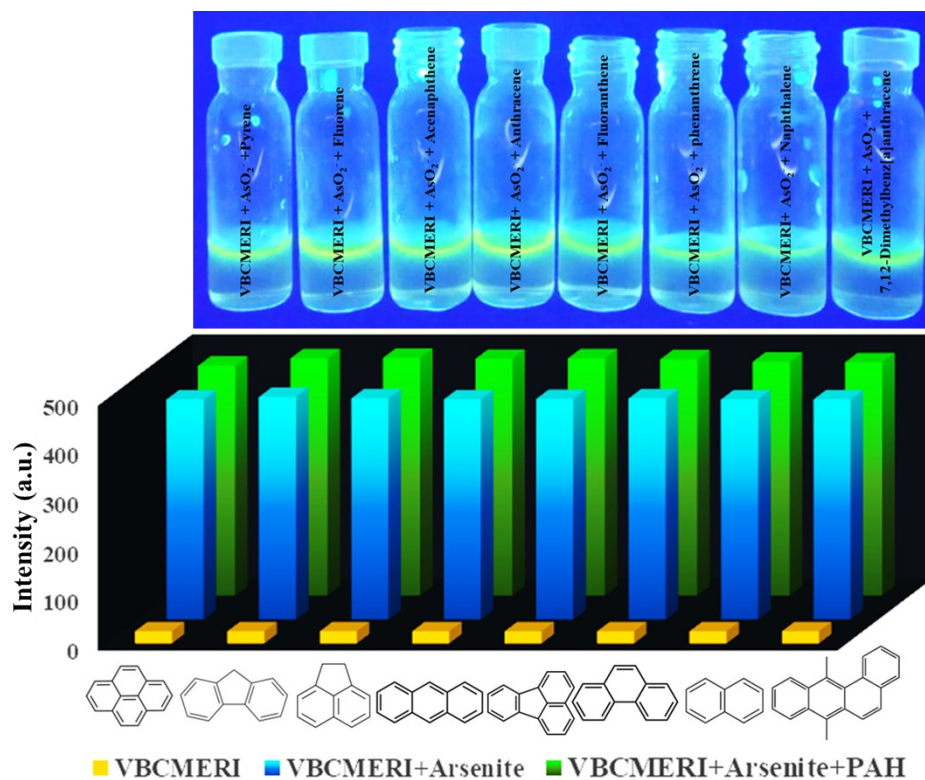

Fig.S10.c. Interference studies of VBCMERIC-AsO<sub>2</sub><sup>-</sup> with Poly-Aromatic Hydrocarbons (PAHs)

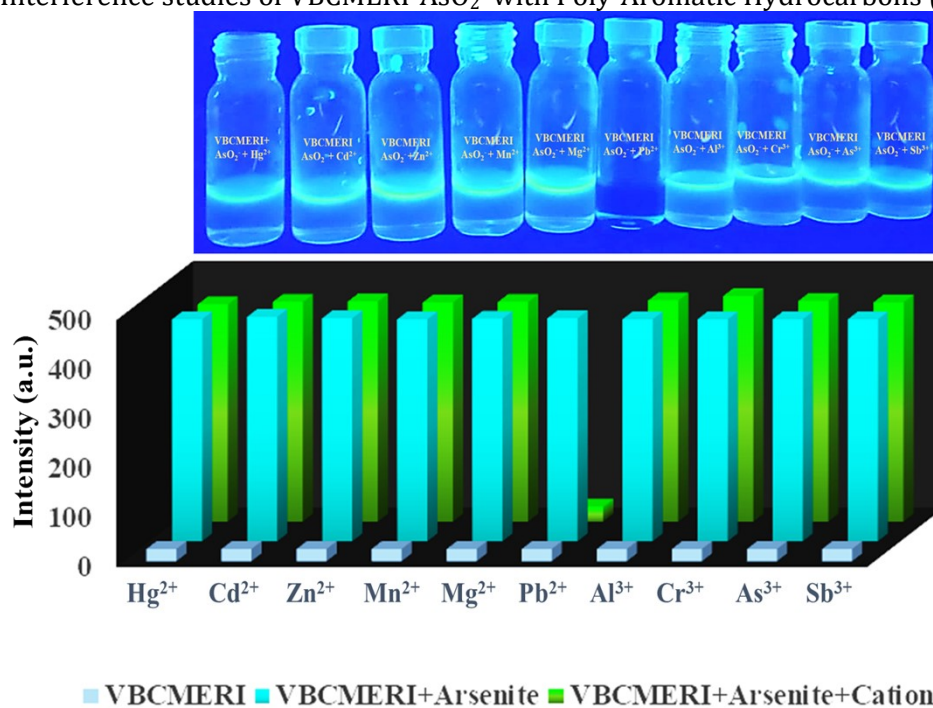

Fig.S10.d. Interference studies of VBCMERIC-AsO<sub>2</sub><sup>-</sup> with different divalent and trivalent metal cations

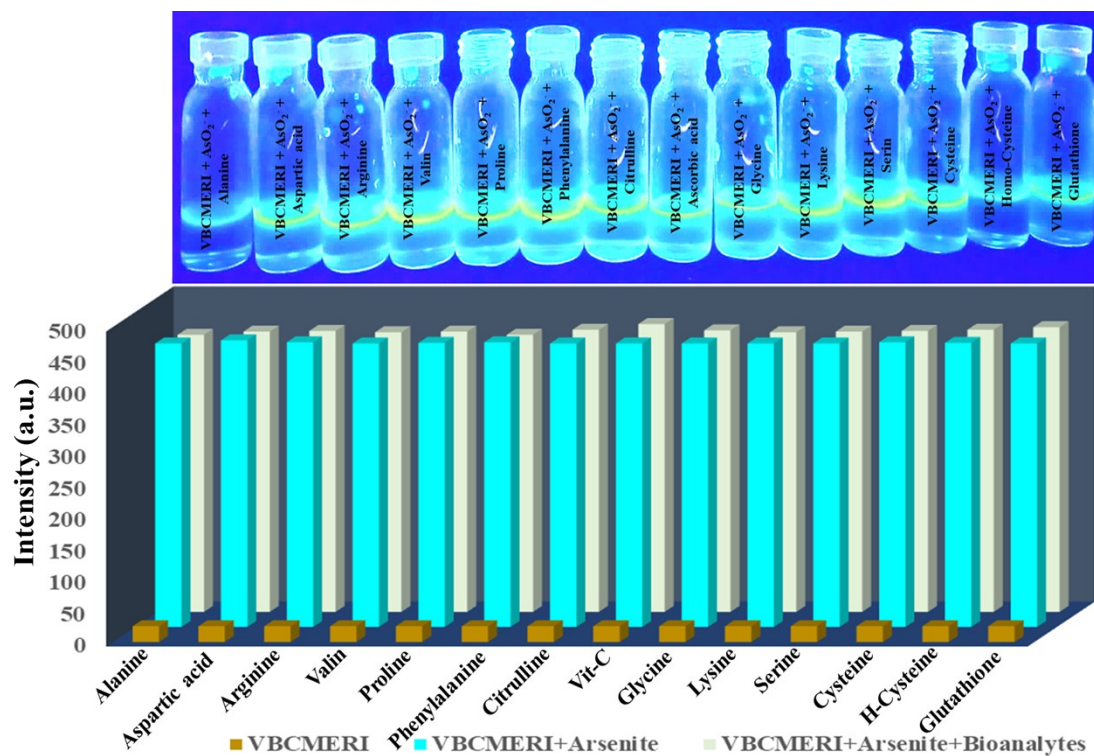

Fig.S10.e. Interference studies of VBCMERIC-AsO<sub>2</sub><sup>-</sup> with different bioanalytes

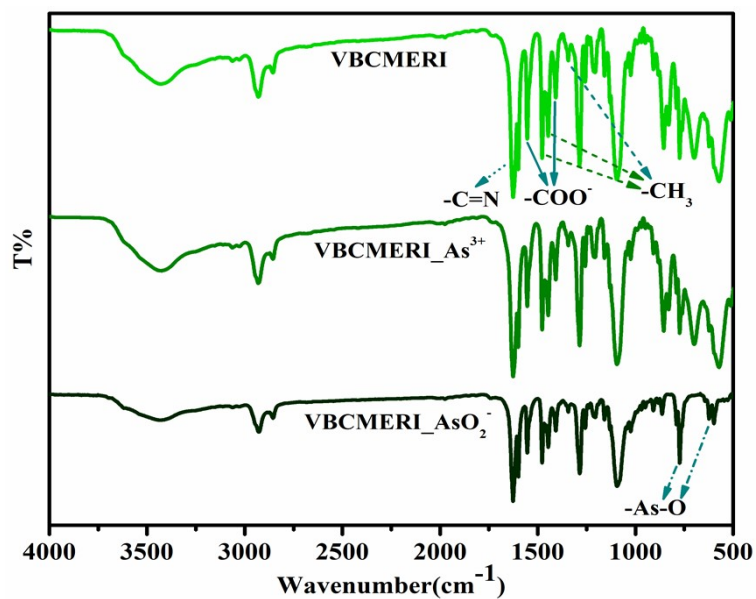

Fig.S11. FT-IR spectra of VBCMERIC, VBCMERIC+As<sup>3+</sup> and VBCMERIC + AsO<sub>2</sub><sup>-</sup> adduct

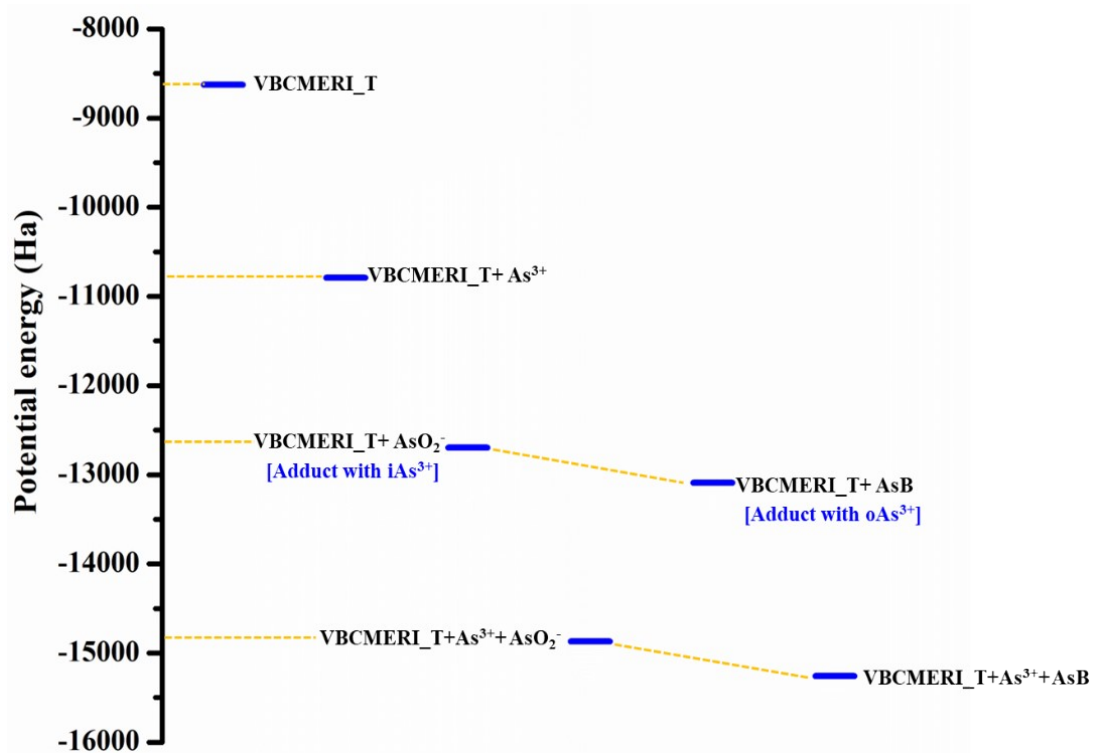

Fig.S12. Variation of P.E. with formation of VBCMEREI-arseno adducts

| Complex_T                                                  | C  | Cu | Mn | As | O | D.E.     |
|------------------------------------------------------------|----|----|----|----|---|----------|
| VBCMEREI_T                                                 | 23 | 1  | 1  | 0  | 7 | -2.16 eV |
| VBCMEREI_T+As <sup>3+</sup>                                | 23 | 1  | 0  | 1  | 7 | -0.69 eV |
| VBCMEREI_T+AsO <sub>2</sub> <sup>-</sup>                   | 18 | 1  | 1  | 1  | 7 | -0.93 eV |
| VBCMEREI_T+AsO <sub>2</sub> <sup>-</sup> +As <sup>3+</sup> | 18 | 1  | 0  | 2  | 7 | -0.81eV  |
| VBCMEREI_T+AsB                                             | 23 | 1  | 1  | 1  | 7 | -2.39 eV |
| VBCMEREI_T+AsB+As <sup>3</sup>                             | 23 | 1  | 0  | 2  | 7 | -4.41eV  |

-Mn; +2As  
+As  
-5C; -Mn; +2As  
+As; -5C  
+As  
+As

Fig.S13. Variation of D.E. with formation of VBCMEREI-arseno adducts

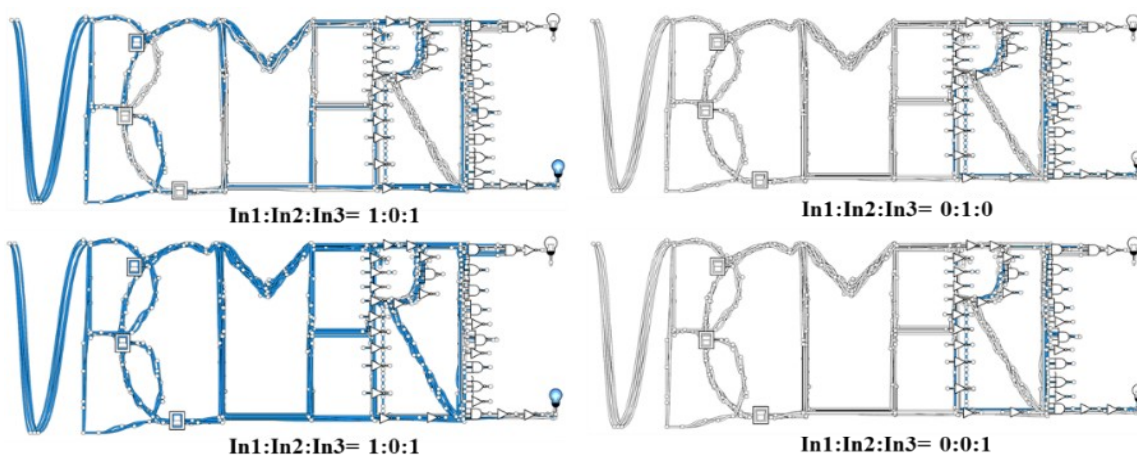

**Fig.S14.** Fabrication of the logic gate with outputs upon altering inputs of NAND–NOT–NOR logic functions for VBCMERI with  $\text{AsO}_2^-$  and  $\text{Pb}^{2+}$

**Table S10. Detection of aquifer-genic  $\text{As}^{3+}$  and  $\text{AsO}_2^-$  using VBCMERI**

| Location                | $\text{As}^{3+}/\text{AsO}_2^-$ (ppb) | PL intensity |
|-------------------------|---------------------------------------|--------------|
| 22.930247°N,88.730335°E | 110.22                                | 139.5        |
| 22.931100°N,88.730653°E | 121.52                                | 140          |
| 22.918097°N,88.720290°E | 94.53                                 | 128.2        |
| 22.918097°N,88.720290°E | 57.24                                 | 116          |
| 22.918094°N,88.720306°E | 45.23                                 | 110          |
| 22.899767°N,88.735926°E | 68.30                                 | 114.8        |
| 22.899767°N,88.735926°E | 184.55                                | 211.2        |
| 22.899767°N,88.735926°E | 178.98                                | 152.9        |
| 22.930267°N,88.730335°E | 136.80                                | 152.1        |
| 22.930267°N,88.730335°E | 181.25                                | 162          |

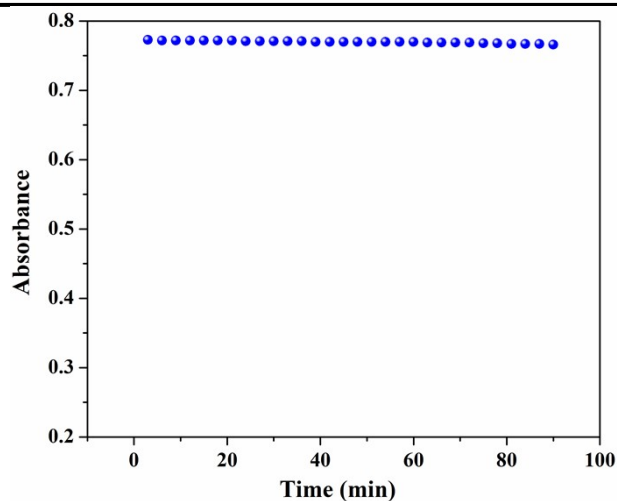

**Fig.S15.a.** Stability of  $\text{AsI}_3$  in  $\text{H}_2\text{O}$

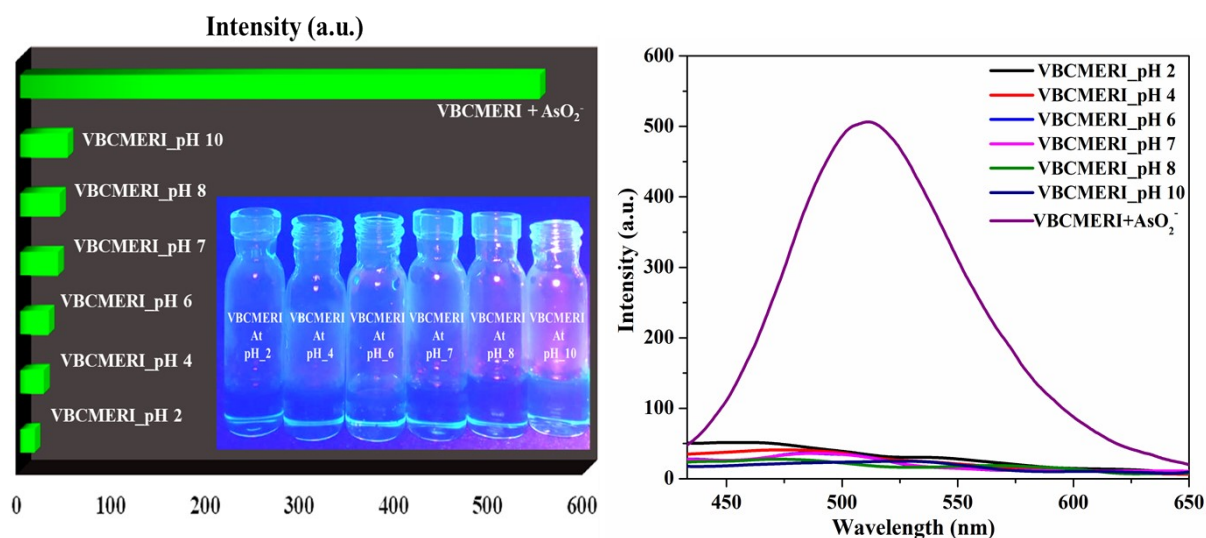

**Fig.S15.b.** pH stability experiment of VBCMERIC probe: Left, bar diagram exhibiting comparative response of VBCMERIC at different pH and VBCMERIC- $\text{AsO}_2^-$  interaction (Inset, physical images of VBCMERIC at diverse pH); Right: Photoluminescence spectral response of VBCMERIC at different pH.

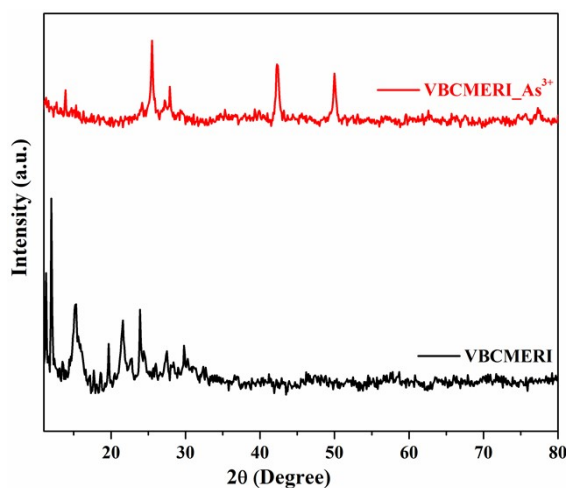

**Fig.S16.a.** Comparative X-Ray diffractogram of VBCMERIC and VBCMERIC+ $\text{As}^{3+}$

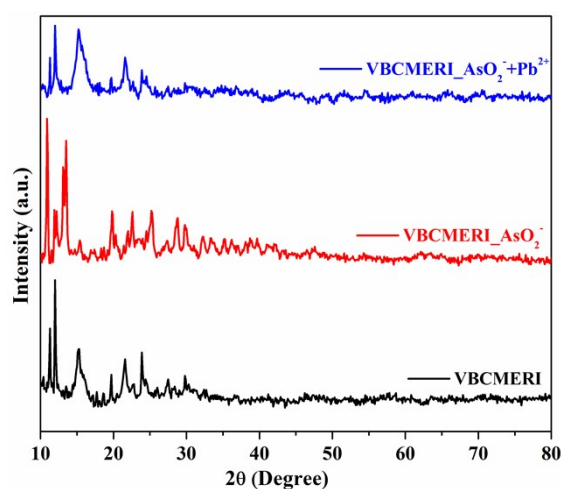

**Fig.S16.b.** Comparative X-Ray diffractogram of VBCMERIC, VBCMERIC+ $\text{AsO}_2^-$  and VBCMERIC+ $\text{AsO}_2^- + \text{Pb}^{2+}$



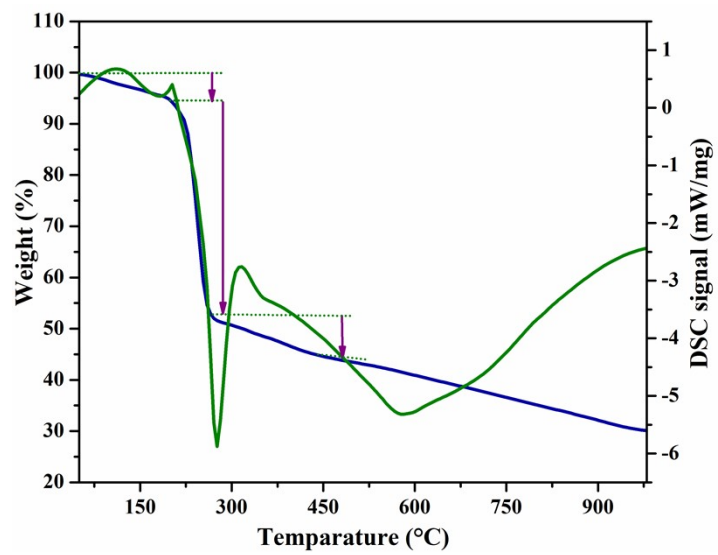

Fig.S17. TGA and DSC plot of VBCMERI probe
